# Supplementary material for: Ambient PM2.5, O3, and NO2 Exposures and Associations with Mortality over 16 Years of Follow-Up in the Canadian Census Health and Environment Cohort (CanCHEC)
Source: PubMed Central journal article supplement (PMC4629747; doi:10.1289/ehp.1409276), 2015-11-01
Supplement: ehp.1409276.s001.acco.pdf [file ehp.1409276.s001.acco.pdf]

**Note to Readers:** *EHP* strives to ensure that all journal content is accessible to all readers. However, some figures and Supplemental Material published in *EHP* articles may not conform to 508 standards due to the complexity of the information being presented. If you need assistance accessing journal content, please contact [ehp508@niehs.nih.gov](mailto:ehp508@niehs.nih.gov). Our staff will work with you to assess and meet your accessibility needs within 3 working days.

## **Supplemental Material**

### **Ambient PM<sub>2.5</sub>, O<sub>3</sub>, and NO<sub>2</sub> Exposures and Associations with Mortality over 16 Years of Follow-Up in the Canadian Census Health and Environment Cohort (CanCHEC)**

Dan L. Crouse, Paul A. Peters, Perry Hystad, Jeffrey R. Brook, Aaron van Donkelaar, Randall V. Martin, Paul J. Villeneuve, Michael Jerrett, Mark S. Goldberg, C. Arden Pope III, Michael Brauer, Robert D. Brook, Alain Robichaud, Richard Menard, and Richard T. Burnett

#### **Table of Contents**

**Table S1.** Descriptive statistics of cohort subjects at baseline and fully-adjusted hazard ratios for risk factors included in the survival models for all non-accidental causes of death (and with each pollutant individually).

**Table S2.** Associations between mortality from non-accidental deaths and PM<sub>2.5</sub>, O<sub>3</sub>, and NO<sub>2</sub>, and effect modification by selected characteristics. All models stratified by age and sex, adjusted for personal and contextual covariates; hazard ratios for PM<sub>2.5</sub> per 10 µg/m<sup>3</sup>, hazard ratios for O<sub>3</sub> and NO<sub>2</sub> per 10 ppb.

**Table S3.** Associations between mortality from cardio-metabolic diseases and PM<sub>2.5</sub>, O<sub>3</sub>, and NO<sub>2</sub>, and effect modification by selected characteristics. All models stratified by age and sex, adjusted for personal and contextual covariates; hazard ratios for PM<sub>2.5</sub> per 10 µg/m<sup>3</sup>, hazard ratios for O<sub>3</sub> and NO<sub>2</sub> per 10 ppb.

**Table S4.** Hazard ratios (and 95% confidence intervals) for mortality by pollutant in single- and multi-pollutant models: models stratified by age and sex, adjusted for personal and contextual

covariates; indirectly adjusted for smoking and obesity; hazard ratios per mean-5th percentile (i.e., 5.0  $\mu\text{g}/\text{m}^3$ , 9.5 ppb, and 8.1 ppb increases in  $\text{PM}_{2.5}$ ,  $\text{O}_3$ , and  $\text{NO}_2$ , respectively).

**Figure S1.** Comparison of satellite-derived estimates of  $\text{PM}_{2.5}$  (median 1998-2006) with observations from fixed-site stations (mean 1984-2006) in 10 Canadian cities.

**Figure S2.** Maps of exposures as assigned to subjects; insets for Vancouver, Toronto, and Montreal.

**Figure S3.** Concentration response plots for mortality by pollutant in single-pollutant models: models stratified by age and sex, adjusted for personal and contextual covariates. a)  $\text{PM}_{2.5}$  (mean: 8.9  $\mu\text{g}/\text{m}^3$ ; knots: 3.9, 8.6, 14.4  $\mu\text{g}/\text{m}^3$ ). b)  $\text{O}_3$  (mean: 39.6 ppb; knots: 30.0, 38.9, 50.7 ppb). c)  $\text{NO}_2$  (mean: 11.6 ppb; knots: 3.1, 9.8, 23.4 ppb).

**Table S1:** Descriptive statistics of cohort subjects at baseline and fully-adjusted hazard ratios for risk factors included in the survival models for all non-accidental causes of death (and with each pollutant individually).

| Subject characteristics at baseline                      | Subjects n <sup>a</sup> (%) | Deaths n <sup>a</sup> (%) | PM <sub>25</sub> mean ± SD (µg/m <sup>3</sup> ) | O <sub>3</sub> mean ± SD (ppb) | NO <sub>2</sub> mean ± SD (ppb) |
|----------------------------------------------------------|-----------------------------|---------------------------|-------------------------------------------------|--------------------------------|---------------------------------|
| All                                                      | 2,521,525 (100)             | 301,115 (100)             | 8.9 ± 3.4                                       | 39.6 ± 6.6                     | 11.6 ± 6.7                      |
| Sex                                                      |                             |                           |                                                 |                                |                                 |
| men                                                      | 1,254,800 (49.8)            | 184,055 (61.1)            | 8.9 ± 3.4                                       | 39.5 ± 6.6                     | 11.5 ± 6.7                      |
| women                                                    | 1,266,725 (50.2)            | 117,060 (38.9)            | 9.0 ± 3.4                                       | 39.6 ± 6.6                     | 11.8 ± 6.7                      |
| Age                                                      |                             |                           |                                                 |                                |                                 |
| 25-34                                                    | 709,075 (28.1)              | 6,265 (2.1)               | 8.9 ± 3.3                                       | 39.4 ± 6.3                     | 11.7 ± 6.6                      |
| 35-64                                                    | 1,434,235 (56.9)            | 119,840 (39.8)            | 8.9 ± 3.4                                       | 39.6 ± 6.6                     | 11.5 ± 6.7                      |
| 65-74                                                    | 251,845 (10.0)              | 112,995 (37.5)            | 9.0 ± 3.5                                       | 39.8 ± 6.9                     | 12.0 ± 7.0                      |
| 75-90                                                    | 126,370 (5.0)               | 62,015 (20.6)             | 8.9 ± 3.6                                       | 39.7 ± 6.9                     | 12.2 ± 7.1                      |
| Aboriginal Ancestry                                      |                             |                           |                                                 |                                |                                 |
| yes                                                      | 100,665 (4.0)               | 7,455 (2.5)               | 7.6 ± 2.5                                       | 36.4 ± 5.4                     | 8.1 ± 5.6                       |
| no                                                       | 2,420,860 (96.0)            | 293,660 (97.5)            | 9.0 ± 3.4                                       | 39.7 ± 6.6                     | 11.8 ± 6.7                      |
| Visible minority status <sup>b</sup>                     |                             |                           |                                                 |                                |                                 |
| yes                                                      | 163,820 (6.5)               | 9,355 (3.1)               | 10.1 ± 3.7                                      | 40.4 ± 6.2                     | 17.9 ± 5.9                      |
| no                                                       | 2,357,705 (93.5)            | 291,760 (96.9)            | 8.8 ± 3.4                                       | 39.5 ± 6.6                     | 11.2 ± 6.6                      |
| Marital status                                           |                             |                           |                                                 |                                |                                 |
| divorced/separate/widowed                                | 328,230 (13.0)              | 74,970 (24.9)             | 9.0 ± 3.4                                       | 39.6 ± 6.6                     | 12.4 ± 7.0                      |
| single                                                   | 306,915 (12.2)              | 25,955 (8.6)              | 9.1 ± 3.4                                       | 39.4 ± 6.1                     | 13.4 ± 7.3                      |
| married/common law                                       | 1,886,380 (74.8)            | 200,190 (66.5)            | 8.9 ± 3.4                                       | 39.6 ± 3.7                     | 11.2 ± 6.5                      |
| Income quintiles                                         |                             |                           |                                                 |                                |                                 |
| lowest                                                   | 405,105 (16.1)              | 72,165 (24.0)             | 8.9 ± 3.4                                       | 39.4 ± 6.5                     | 12.2 ± 7.3                      |
| lower middle                                             | 485,370 (19.2)              | 74,925 (24.9)             | 9.0 ± 3.4                                       | 39.6 ± 6.6                     | 12.0 ± 7.0                      |
| middle                                                   | 528,840 (21.0)              | 56,350 (18.7)             | 8.9 ± 3.4                                       | 39.5 ± 6.6                     | 11.6 ± 6.7                      |
| upper middle                                             | 547,375 (21.7)              | 49,325 (16.4)             | 8.9 ± 3.4                                       | 39.6 ± 6.6                     | 11.4 ± 6.5                      |
| upper                                                    | 554,835 (22.0)              | 48,350 (16.1)             | 8.9 ± 3.4                                       | 39.6 ± 6.6                     | 11.2 ± 6.3                      |
| Education                                                |                             |                           |                                                 |                                |                                 |
| < high school graduation                                 | 867,110 (34.4)              | 171,755 (57.0)            | 8.8 ± 3.4                                       | 39.3 ± 6.7                     | 11.0 ± 7.1                      |
| high school graduation with or without trade certificate | 924,200 (36.7)              | 85,000 (28.2)             | 8.9 ± 3.4                                       | 39.5 ± 6.6                     | 11.4 ± 6.5                      |
| some postsecondary, or college diploma                   | 393,955 (15.6)              | 25,160 (8.4)              | 8.9 ± 3.4                                       | 39.7 ± 6.6                     | 11.9 ± 6.4                      |
| ≥ university degree                                      | 336,260 (13.3)              | 19,200 (6.4)              | 9.3 ± 3.4                                       | 40.1 ± 6.2                     | 13.5 ± 6.4                      |

|                     |                  |                |            |            |            |
|---------------------|------------------|----------------|------------|------------|------------|
| Occupational class  |                  |                |            |            |            |
| not applicable      | 601,130 (23.8)   | 188,760 (62.7) | 8.9 ± 3.5  | 39.5 ± 6.7 | 11.7 ± 7.1 |
| unskilled           | 196,550 (7.8)    | 15,275 (5.1)   | 8.8 ± 3.4  | 39.3 ± 6.7 | 11.3 ± 7.0 |
| semi-skilled        | 617,035 (24.5)   | 35,080 (11.7)  | 9.0 ± 3.4  | 39.7 ± 6.6 | 11.7 ± 6.7 |
| technical           | 610,375 (24.2)   | 37,910 (12.6)  | 8.8 ± 3.4  | 39.4 ± 6.6 | 11.1 ± 6.5 |
| management          | 209,370 (8.3)    | 12,515 (4.2)   | 9.1 ± 3.3  | 39.9 ± 6.5 | 12.2 ± 6.3 |
| professional        | 287,065 (11.4)   | 11,575 (3.8)   | 9.1 ± 3.4  | 39.8 ± 6.4 | 12.5 ± 6.4 |
| Labour force status |                  |                |            |            |            |
| not in labour force | 697,590 (27.7)   | 203,970 (67.7) | 8.9 ± 3.5  | 39.4 ± 6.7 | 11.7 ± 7.0 |
| unemployed          | 171,095 (6.8)    | 9,700 (3.2)    | 8.7 ± 3.3  | 38.9 ± 6.2 | 11.3 ± 7.2 |
| employed            | 1,652,840 (65.5) | 87,445 (29.0)  | 9.0 ± 3.4  | 39.7 ± 6.6 | 11.7 ± 6.6 |
| Immigrant status    |                  |                |            |            |            |
| Canadian born       | 2,035,550 (80.7) | 240,525 (79.9) | 8.6 ± 3.3  | 39.1 ± 6.5 | 10.7 ± 6.4 |
| immigrant           | 485,975 (19.3)   | 60,590 (20.1)  | 10.1 ± 3.7 | 41.3 ± 6.7 | 15.8 ± 6.6 |

<sup>a</sup>. subject counts rounded to nearest 5; percentages based on original values

<sup>b</sup>. Visible minorities are persons (other than aboriginal persons), who are non-Caucasian in race or non-white in colour.

**Table S2.** Associations between mortality from non-accidental deaths and PM<sub>2.5</sub>, O<sub>3</sub>, and NO<sub>2</sub>, and effect modification by selected characteristics. All models stratified by age and sex, adjusted for personal<sup>a</sup> and contextual<sup>b</sup> covariates; hazard ratios for PM<sub>2.5</sub> per 10 µg/m<sup>3</sup>, hazard ratios for O<sub>3</sub> and NO<sub>2</sub> per 10 ppb.

| Effect modifier                       | Events<br>n (%) | PM <sub>2.5</sub> HR (95% CI) | P <sup>c</sup> | O <sub>3</sub> HR (95% CI) | P <sup>c</sup> | NO <sub>2</sub> HR (95% CI) | P <sup>c</sup> |
|---------------------------------------|-----------------|-------------------------------|----------------|----------------------------|----------------|-----------------------------|----------------|
| None                                  | 301,115 (100)   | 1.072 (1.060, 1.084)          |                | 1.033 (1.027, 1.038)       |                | 1.065 (1.056, 1.074)        |                |
| Women by age during follow-up (years) |                 |                               |                |                            |                |                             |                |
| all ages                              | 117,060 (38.9)  | 1.035 (1.017, 1.054)          |                | 1.014 (1.005, 1.023)       |                | 1.065 (1.051, 1.079)        |                |
| less than 60                          | 17,360 (5.8)    | 1.061 (1.011, 1.113)          |                | 1.028 (1.004, 1.053)       |                | 1.175 (1.134, 1.218)        |                |
| 60-69                                 | 17,875 (5.9)    | 1.048 (1.000, 1.098)          |                | 1.032 (1.009, 1.056)       |                | 1.047 (1.012, 1.085)        |                |
| 70-79                                 | 34,655 (11.5)   | 1.041 (1.007, 1.075)          |                | 1.021 (1.005, 1.038)       |                | 1.094 (1.067, 1.121)        |                |
| 80 - 89                               | 47,170 (15.7)   | 1.021 (0.994, 1.050)          |                | 0.996 (0.982, 1.009)       |                | 1.018 (0.997, 1.039)        |                |
|                                       |                 |                               | 0.33           |                            | 0.00           |                             | 0.45           |
| Men, by age during follow-up (years)  |                 |                               |                |                            |                |                             |                |
| all ages                              | 184,055 (61.1)  | 1.097 (1.081, 1.113)          |                | 1.044 (1.037, 1.052)       |                | 1.065 (1.054, 1.077)        |                |
| less than 60                          | 25,670 (8.5)    | 1.137 (1.093, 1.183)          |                | 1.073 (1.052, 1.094)       |                | 1.134 (1.101, 1.168)        |                |
| 60-69                                 | 37,690 (12.5)   | 1.121 (1.085, 1.157)          |                | 1.062 (1.045, 1.079)       |                | 1.070 (1.044, 1.096)        |                |
| 70-79                                 | 65,535 (21.8)   | 1.097 (1.071, 1.124)          |                | 1.039 (1.026, 1.051)       |                | 1.050 (1.031, 1.070)        |                |
| 80 - 89                               | 55,160 (18.3)   | 1.065 (1.038, 1.093)          |                | 1.025 (1.012, 1.038)       |                | 1.040 (1.020, 1.061)        |                |
|                                       |                 |                               | 0.02           |                            | 0.00           |                             | 0.00           |
| Income                                |                 |                               |                |                            |                |                             |                |
| Bottom quintile                       | 72,165 (24.0)   | 1.099 (1.074, 1.124)          |                | 1.044 (1.033, 1.056)       |                | 1.149 (1.130, 1.168)        |                |
| Top quintile                          | 48,350 (16.1)   | 1.049 (1.020, 1.079)          |                | 1.021 (1.007, 1.035)       |                | 0.987 (0.965, 1.009)        |                |
|                                       |                 |                               | 0.01           |                            | 0.01           |                             | 0.00           |
| Immigrant status                      |                 |                               |                |                            |                |                             |                |
| Non-immigrant                         | 240,525 (79.9)  | 1.095 (1.081, 1.109)          |                | 1.043 (1.036, 1.049)       |                | 1.064 (1.054, 1.074)        |                |
| Immigrant                             | 60,590 (20.1)   | 1.001 (0.978, 1.024)          |                | 0.996 (0.985, 1.008)       |                | 1.073 (1.053, 1.093)        |                |
|                                       |                 |                               | 0.00           |                            | 0.00           |                             | 0.43           |

<sup>a</sup> personal covariates: aboriginal ancestry, visible minority status, highest level of education, employment status, occupational class, immigrant status, marital status, income quintile

<sup>b</sup> contextual covariates: census division and census tract – census division % of immigrants, % of adults without high school diploma, % of subjects in lowest income quintile

<sup>c</sup> P-value for Q-statistic (test for effect modification)

**Table S3.** Associations between mortality from cardio-metabolic diseases and PM<sub>2.5</sub>, O<sub>3</sub>, and NO<sub>2</sub>, and effect modification by selected characteristics. All models stratified by age and sex, adjusted for personal<sup>a</sup> and contextual<sup>b</sup> covariates; hazard ratios for PM<sub>2.5</sub> per 10 µg/m<sup>3</sup>, hazard ratios for O<sub>3</sub> and NO<sub>2</sub> per 10 ppb.

| Effect modifier                       | Events<br>n (%) | PM <sub>2.5</sub> HR (95% CI) | P <sup>c</sup> | O <sub>3</sub> HR (95% CI) | P <sup>c</sup> | NO <sub>2</sub> HR (95% CI) | P <sup>c</sup> |
|---------------------------------------|-----------------|-------------------------------|----------------|----------------------------|----------------|-----------------------------|----------------|
| None                                  | 117,495 (100)   | 1.079 (1.060, 1.098)          |                | 1.048 (1.039, 1.057)       |                | 1.050 (1.036, 1.064)        |                |
| Women by age during follow-up (years) |                 |                               |                |                            |                |                             |                |
| all ages                              | 43,210 (36.8)   | 1.065 (1.034, 1.097)          |                | 1.040 (1.025, 1.055)       |                | 1.051 (1.028, 1.075)        |                |
| less than 60                          | 3,145 (2.7)     | 1.158 (1.032, 1.299)          |                | 1.101 (1.040, 1.165)       |                | 1.226 (1.128, 1.332)        |                |
| 60-69                                 | 4,635 (3.9)     | 1.090 (0.994, 1.196)          |                | 1.074 (1.027, 1.124)       |                | 1.047 (0.977, 1.121)        |                |
| 70-79                                 | 12,910 (11.0)   | 1.071 (1.016, 1.130)          |                | 1.056 (1.029, 1.085)       |                | 1.070 (1.027, 1.114)        |                |
| 80 - 89                               | 22,520 (19.2)   | 1.049 (1.008, 1.092)          | 0.41           | 1.015 (0.995, 1.036)       | 0.01           | 1.023 (0.992, 1.054)        | 0.37           |
| Men, by age during follow-up (years)  |                 |                               |                |                            |                |                             |                |
| all ages                              | 74,285 (63.2)   | 1.088 (1.064, 1.113)          |                | 1.052 (1.041, 1.064)       |                | 1.051 (1.033, 1.069)        |                |
| less than 60                          | 9,095 (7.7)     | 1.133 (1.059, 1.211)          |                | 1.084 (1.049, 1.121)       |                | 1.036 (0.985, 1.090)        |                |
| 60-69                                 | 13,930 (11.9)   | 1.127 (1.069, 1.189)          |                | 1.076 (1.048, 1.105)       |                | 1.066 (1.024, 1.110)        |                |
| 70-79                                 | 26,730 (22.7)   | 1.114 (1.073, 1.157)          |                | 1.054 (1.035, 1.074)       |                | 1.056 (1.026, 1.087)        |                |
| 80 - 89                               | 24,530 (20.9)   | 1.029 (0.990, 1.069)          | 0.01           | 1.025 (1.006, 1.044)       | 0.00           | 1.037 (1.007, 1.068)        | 0.65           |
| Income                                |                 |                               |                |                            |                |                             |                |
| Bottom quintile                       | 30,460 (25.9)   | 1.099 (1.061, 1.139)          |                | 1.053 (1.035, 1.072)       |                | 1.134 (1.105, 1.163)        |                |
| Top quintile                          | 17,145 (14.6)   | 1.097 (1.047, 1.149)          | 0.95           | 1.053 (1.030, 1.077)       | 1.00           | 0.964 (0.929, 1.001)        | 0.00           |
| Immigrant status                      |                 |                               |                |                            |                |                             |                |
| Non-immigrant                         | 93,365 (79.5)   | 1.114 (1.091, 1.137)          |                | 1.067 (1.056, 1.078)       |                | 1.042 (1.026, 1.058)        |                |
| Immigrant                             | 24,130 (20.5)   | 0.977 (0.942, 1.014)          | 0.00           | 0.983 (0.965, 1.002)       | 0.00           | 1.080 (1.048, 1.112)        | 0.04           |

<sup>a</sup> personal covariates: aboriginal ancestry, visible minority status, highest level of education, employment status, occupational class, immigrant status, marital status, income quintile

<sup>b</sup> contextual covariates: census division and census tract – census division % of immigrants, % of adults without high school diploma, % of subjects in lowest income quintile

<sup>c</sup> P-value for Q-statistic (test for effect modification)

**Table S4.** Hazard ratios (and 95% confidence intervals) for mortality by pollutant in single- and multi-pollutant models: models stratified by age and sex, adjusted for personal<sup>a</sup> and contextual<sup>b</sup> covariates; indirectly adjusted for smoking and obesity; hazard ratios per mean-5th percentile (i.e., 5.0 µg/m<sup>3</sup>, 9.5 ppb, and 8.1 ppb increases in PM<sub>2.5</sub>, O<sub>3</sub>, and NO<sub>2</sub>, respectively).

|                                                                   | <b>Non-accidental</b>   | <b>Trachea, bronchus, and lung cancers</b> | <b>Cardio-metabolic diseases</b> | <b>Diabetes</b>         | <b>Cardiovascular</b>   | <b>Ischemic heart disease</b> | <b>Cerebrovascular</b>  | <b>Diseases of the respiratory system</b> | <b>Chronic obstructive pulmonary disease and allied conditions</b> |
|-------------------------------------------------------------------|-------------------------|--------------------------------------------|----------------------------------|-------------------------|-------------------------|-------------------------------|-------------------------|-------------------------------------------|--------------------------------------------------------------------|
| PM <sub>2.5</sub> alone                                           | 1.048<br>(1.040, 1.056) | 1.064<br>(1.040, 1.088)                    | 1.047<br>(1.037, 1.057)          | 1.155<br>(1.118, 1.193) | 1.038<br>(1.027, 1.049) | 1.099<br>(1.084, 1.113)       | 0.969<br>(0.948, 0.991) | 0.986<br>(0.967, 1.007)                   | 1.008<br>(0.981, 1.036)                                            |
| PM <sub>2.5</sub> adjusted for O <sub>3</sub> and NO <sub>2</sub> | 1.015<br>(1.002, 1.028) | 1.059<br>(1.020, 1.100)                    | 0.998<br>(0.983, 1.014)          | 1.052<br>(1.002, 1.105) | 0.993<br>(0.977, 1.010) | 1.029<br>(1.008, 1.051)       | 0.939<br>(0.908, 0.971) | 0.984<br>(0.954, 1.016)                   | 1.016<br>(0.973, 1.061)                                            |
| O <sub>3</sub> alone                                              | 1.043<br>(1.036, 1.050) | 1.036<br>(1.015, 1.057)                    | 1.054<br>(1.045, 1.064)          | 1.163<br>(1.128, 1.199) | 1.045<br>(1.035, 1.055) | 1.100<br>(1.086, 1.113)       | 0.990<br>(0.970, 1.011) | 0.984<br>(0.966, 1.003)                   | 0.992<br>(0.966, 1.017)                                            |
| O <sub>3</sub> adjusted for PM <sub>2.5</sub> and NO <sub>2</sub> | 1.028<br>(1.017, 1.039) | 0.990<br>(0.958, 1.022)                    | 1.052<br>(1.037, 1.066)          | 1.123<br>(1.074, 1.174) | 1.046<br>(1.030, 1.061) | 1.073<br>(1.053, 1.093)       | 1.033<br>(1.001, 1.065) | 0.990<br>(0.962, 1.019)                   | 0.974<br>(0.937, 1.012)                                            |
| NO <sub>2</sub> alone                                             | 1.054<br>(1.044, 1.065) | 1.061<br>(1.030, 1.093)                    | 1.042<br>(1.029, 1.055)          | 1.04<br>(1.001, 1.085)  | 1.043<br>(1.029, 1.057) | 1.065<br>(1.048, 1.083)       | 1.008<br>(0.981, 1.037) | 1.032<br>(1.006, 1.058)                   | 1.053<br>(1.017, 1.090)                                            |
| NO <sub>2</sub> adjusted for PM <sub>2.5</sub> and O <sub>3</sub> | 1.044<br>(1.033, 1.056) | 1.043<br>(1.019, 1.067)                    | 1.034<br>(1.020, 1.047)          | 1.008<br>(0.967, 1.051) | 1.037<br>(1.022, 1.051) | 1.042<br>(1.024, 1.061)       | 1.024<br>(0.995, 1.054) | 1.039<br>(1.012, 1.067)                   | 1.052<br>(1.015, 1.092)                                            |

<sup>a</sup> aboriginal ancestry, visible minority status, highest level of education, employment status, occupational class, immigrant status, marital status, income quintile

<sup>b</sup> census division and census tract-census division % of immigrants, % of adults without high school diploma, % of subjects in lowest income quintile

**Figure S1.** Comparison of satellite-derived estimates of PM<sub>2.5</sub> (median 1998-2006) with observations from fixed-site stations (mean 1984-2006) in 10 Canadian cities.

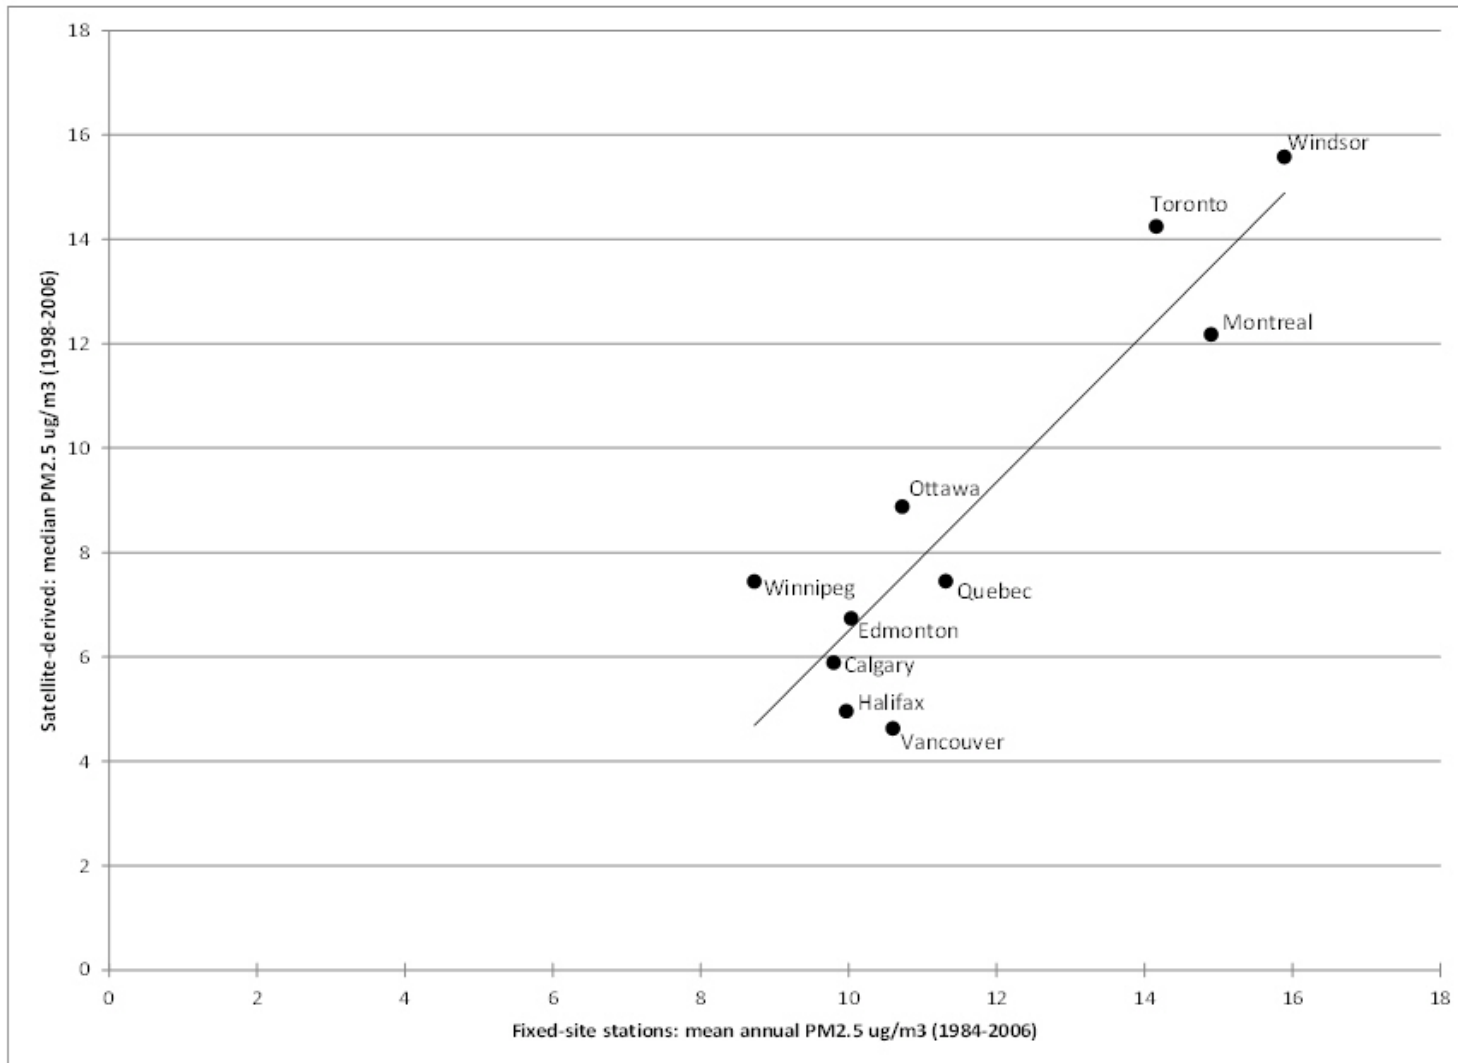



**Figure S2.** Maps of exposures as assigned to subjects; insets for Vancouver, Toronto, and Montreal.

**Panel a) PM<sub>2.5</sub>**

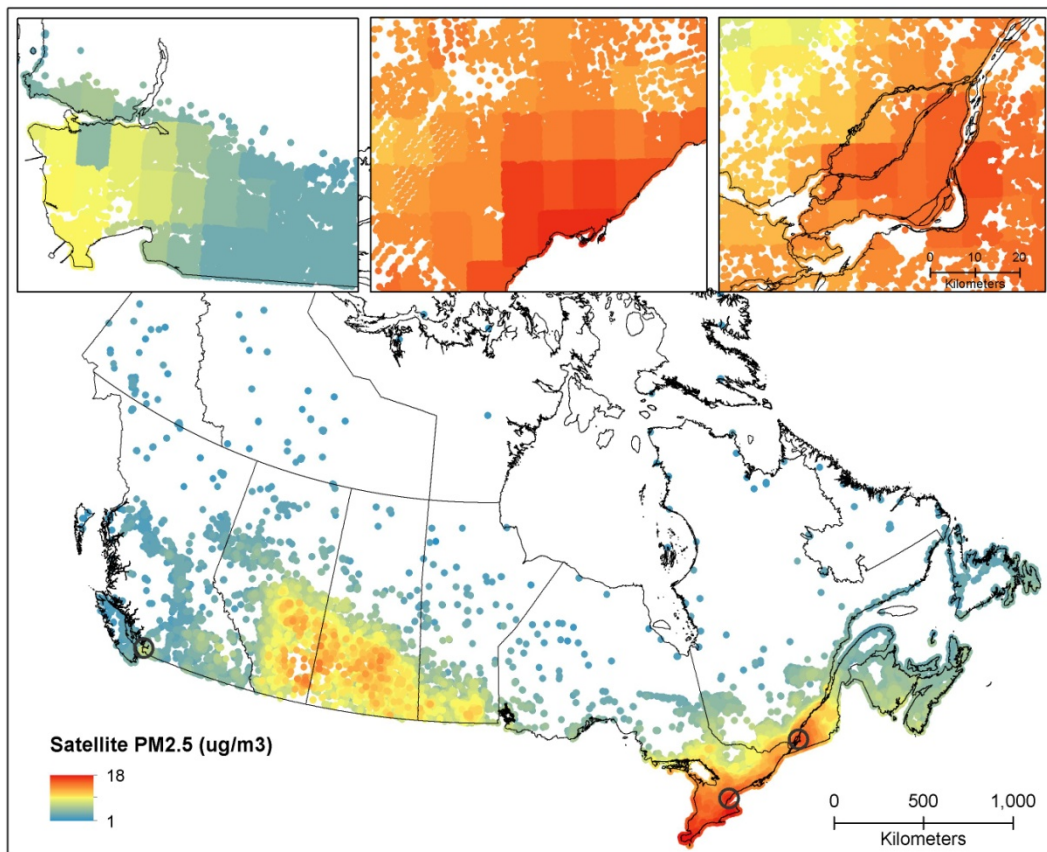

Panel b) O<sub>3</sub>

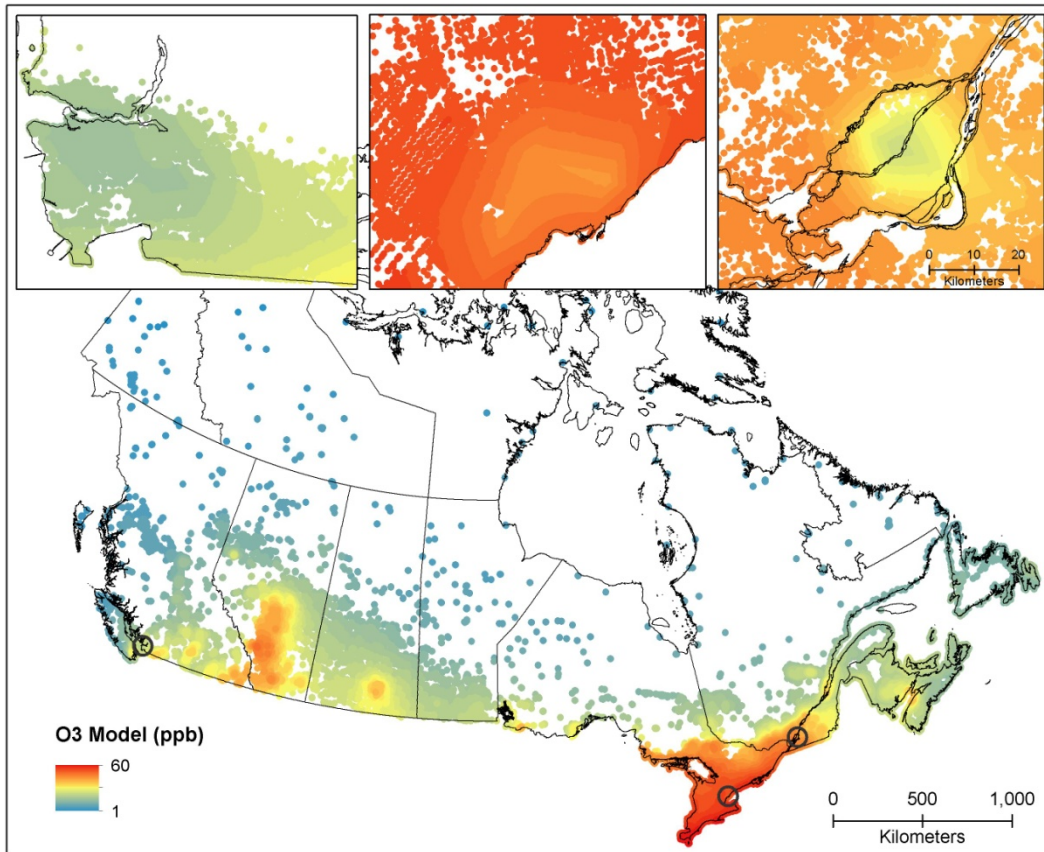

Panel c) NO<sub>2</sub>

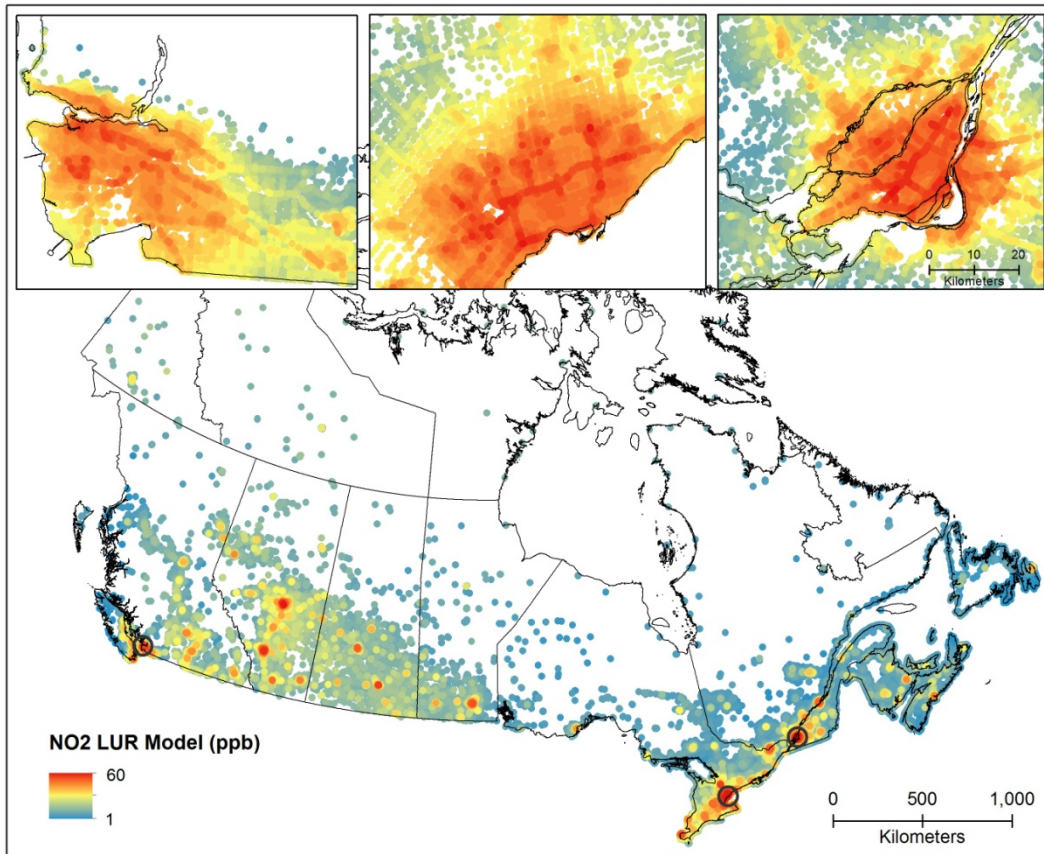

**Figure S3.** Concentration response plots for mortality by pollutant in single-pollutant models: models stratified by age and sex, adjusted for personal<sup>a</sup> and contextual<sup>b</sup> covariates. a) PM<sub>2.5</sub> (mean: 8.9  $\mu\text{g}/\text{m}^3$ ; knots: 3.9, 8.6, 14.4  $\mu\text{g}/\text{m}^3$ ). b) O<sub>3</sub> (mean: 39.6 ppb; knots: 30.0, 38.9, 50.7 ppb). c) NO<sub>2</sub> (mean: 11.6 ppb; knots: 3.1, 9.8, 23.4 ppb).

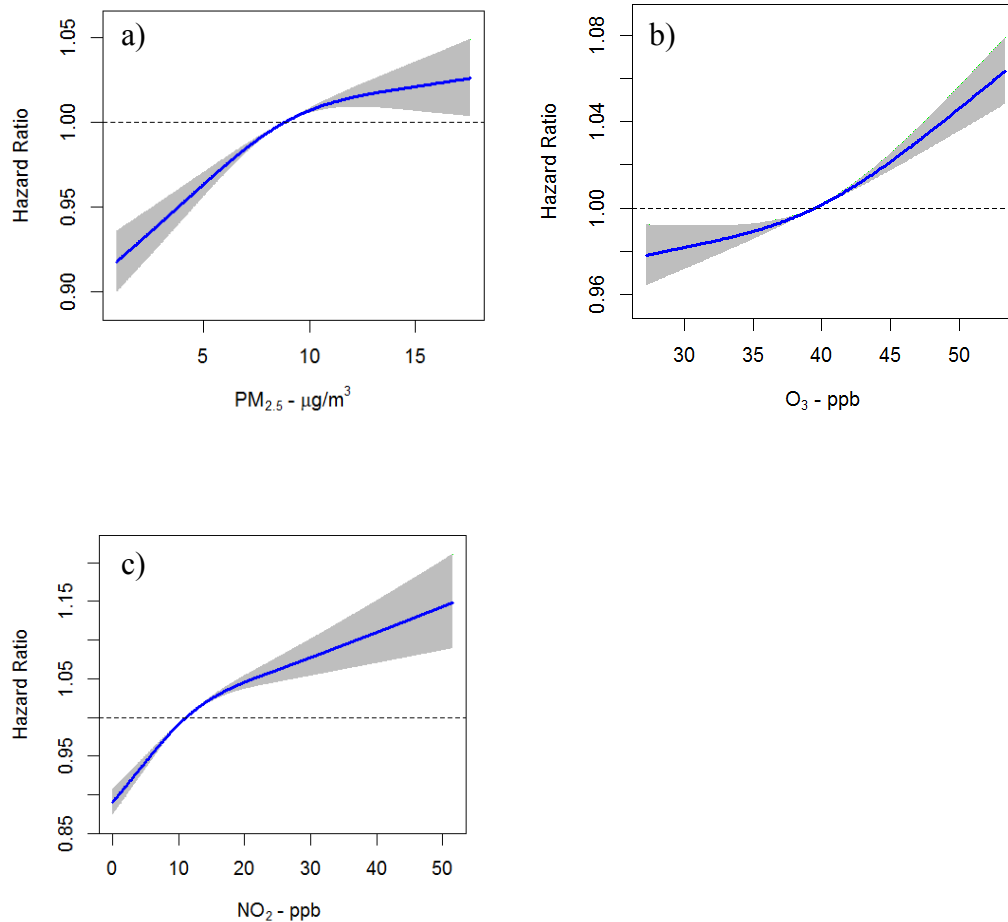

<sup>a</sup>. aboriginal ancestry, visible minority status, highest level of education, employment status, occupational class, immigrant status, marital status, income quintile

<sup>b</sup>. census division and census tract-census division % of immigrants, % of adults without high school diploma, % of subjects in lowest income quintile
